# Supplementary material for: Sunitinib for Metastatic Renal Cell Carcinoma: A Systematic Review and Meta-Analysis of Real-World and Clinical Trials Data
Source: Springer Nature journal article supplement (doi:10.1007/s11523-019-00653-5), 2019-07-12
Supplement: MOESM1 [file 16924604]

**Sunitinib for Metastatic Renal Cell Carcinoma: A Systematic Review and  
Meta-Analysis of Real-World and Clinical Trials Data**

**Michael Moran<sup>1</sup> · Dana Nickens<sup>2</sup> · Katherine Adcock<sup>3</sup> · Meg Bennetts<sup>4</sup> · Arial Desscan<sup>3</sup> ·  
Natalie Charnley<sup>5</sup> · Kate Fife<sup>6</sup>**

<sup>1</sup>Pfizer GmbH, Berlin, Germany; <sup>2</sup>Pfizer Global, La Jolla, CA, USA; <sup>3</sup>Pfizer Inc., London,  
UK; <sup>4</sup>Pfizer R&D UK Ltd, Sandwich, UK; <sup>5</sup>Lancashire Teaching Hospitals, UK; <sup>6</sup>Cambridge  
University Hospital, Cambridge, UK.

**Corresponding author:** Michael Moran, PhD, Pfizer GmbH, Linkstraße 10, 10785 Berlin,  
Germany.

**Email:** michael.m.moran@pfizer.com

**Tel:** +44 7584 145766

**Running heading:** Real-world and clinical trial data for sunitinib in mRCC

**Supplementary Table 1.** Main characteristics of included RCTs

| Author                  | Year | Phase | Treatment          | Total                 |                      |                           |                          |                  |
|-------------------------|------|-------|--------------------|-----------------------|----------------------|---------------------------|--------------------------|------------------|
|                         |      |       |                    | patients,<br><i>n</i> | Median<br>age, years | mPFS, months<br>(95 % CI) | mOS, months<br>(95 % CI) | ORR, % (95 % CI) |
| Motzer et al. [1]       | 2009 | III   | Sunitinib          | 375                   | -                    | 11 (11–13)                | 26.4 (23.0–32.9)         | 47 (42–52)       |
|                         |      |       | INF- $\alpha$      | 375                   | -                    | 5 (4–6)                   | 21.8 (17.9–26.9)         | 12 (9–16)        |
| Motzer et al. [2]       | 2012 | II    | Sunitinib 4/2      | 146                   | 61                   | 8.5 (6.9–11.1)            | 23.1 (17.4–25.4)         | 32 (24.7–40.4)   |
|                         |      |       | Sunitinib CDD      | 146                   | 64                   | 7.0 (6.0–8.7)             | 23.5 (17.5–NR)           | 28 (21.0–36.1)   |
| Motzer et al. [3]       | 2013 | III   | Sunitinib          | 553                   | -                    | 9.5 (8.3–11.1)            | 29.3 (25.3–32.5)         | 25 (-)           |
|                         |      |       | Pazopanib          | 557                   | -                    | 8.4 (8.3–10.9)            | 28.4 (26.2–35.6)         | 31 (-)           |
| Motzer et al. [4]       | 2014 | II    | Sunitinib          | 233                   | 62                   | 7.9 (5.6–8.2)             | -                        | 27 (-)           |
|                         |      |       | Everolimus         | 238                   | 62                   | 10.7 (8.2–11.5)           | -                        | 8 (-)            |
| Rini et al. [5]         | 2016 | III   | Sunitinib          | 135                   | 59.8                 | 15.1 (10.2–18.6)          | NR                       | -                |
|                         |      |       | Sunitinib + IMA901 | 204                   | 62.2                 | 15.2 (12.5–18.1)          | 33.2 (27.8–41.4)         | -                |
| Armstrong et al.<br>[6] | 2016 | II    | Sunitinib          | 51                    | 59                   | 8.3 (5.8–11.4)            | 31.5 (14.8–NR)           | -                |
|                         |      |       | Everolimus         | 57                    | 64                   | 5.6 (5.5–5.6)             | 13.2 (9.7–27.9)          | -                |
| Choueiri et al. [7]     | 2017 | II    | Sunitinib          | 78                    | 64                   | 5.6 (3.4–8.1)             | 21.8 (16.3–27.0)         | 18.8 (11.0–30.2) |
|                         |      |       | Cabozantinib       | 79                    | 63                   | 8.2 (6.2–8.8)             | 30.3 (14.6–35.0)         | 46 (34–57)       |

CDD, continuous daily dosing; CI, confidence interval; IFN- $\alpha$ , interferon-alpha; mOS, median overall survival; mPFS, median progression-free survival; NR, not reached; ORR, objective response rate; RCTs, randomized controlled trials; 4/2, 4 weeks on 2 weeks off dosing

**Supplementary Table 2.** Main characteristics of included RWD studies

| Author                   | Year | Database                                               | Treatment | Total                 |                      |                           |                          |        |
|--------------------------|------|--------------------------------------------------------|-----------|-----------------------|----------------------|---------------------------|--------------------------|--------|
|                          |      |                                                        |           | patients,<br><i>n</i> | Median age,<br>years | mPFS, months<br>(95 % CI) | mOS, months<br>(95 % CI) | ORR, % |
| Heng et al. [8]          | 2009 | British Columbia, Canada                               | Sunitinib | 69                    | 63                   | -                         | 17.3                     | -      |
| Bamias et al. [9]        | 2010 | Greek Oncology, HECOG                                  | Sunitinib | 109                   | 59                   | 8.9 (6.4–11.4)            | 17.1 (13.7–20.6)         | 22.4   |
| Schnadig et al.<br>[10]  | 2014 | McKesson Specialty Health US<br>Oncology Network       | Sunitinib | 134                   | 64                   | 7.5 (5.3–11.6)            | 15.5 (12.3–24.0)         | 16.4   |
| De Giorgi et al.<br>[11] | 2014 | Italian oncology units                                 | Sunitinib | 185                   | 74                   | 11.0 (8.7–14.6)           | 25.5 (17.2–31.7)         | 34.6   |
| Miyake et al.<br>[12]    | 2014 | Japanese patients from institution                     | Sunitinib | 110                   | 62.5                 | 7.8                       | 33.2                     | 27.3   |
| Sheng et al. [13]        | 2016 | Chinese patients, Peking University<br>Cancer Hospital | Sunitinib | 165                   | 55                   | 11 (9–14)                 | 28 (19–33)               | 31.9   |
| Pan et al. [14]          | 2015 | Changzheng and Changhai Hospital,<br>China             | Sunitinib | 50                    | 62                   | 9.4                       | -                        | 14.0   |
| Tan et al. [15]          | 2015 | National Cancer Centre Singapore<br>Registry           | Sunitinib | 127                   | 58                   | 7.9 (5.2–11.0)            | 16.5 (15.1–21.6)         | 32.5   |
| Day et al. [16]          | 2015 | Australian academic hospitals                          | Sunitinib | 125                   | 60.7                 | -                         | 27.6                     | -      |

|                   |      |                                           |           |      |      |                 |                  |      |
|-------------------|------|-------------------------------------------|-----------|------|------|-----------------|------------------|------|
| Poprach et al.    | 2016 | RENIS Register, Czech Republic            | Sunitinib | 1016 | 62   | 10.8 (9.8–11.8) | 31.9 (27.9–35.9) | -    |
| [17]              |      |                                           | Sunitinib | 299  | 74   | 8.8 (7.2–10.4)  | 26.3 (21.3–31.2) | -    |
| De Groot et al.   | 2016 | PERCEPTION Dutch Cancer Registry          | Sunitinib | 153  | 64   | -               | 6.8 (5.8–8.8)    | -    |
| [18]              |      |                                           |           |      |      |                 |                  |      |
| Zhang et al.      | 2017 | Chinese hospitals                         | Sunitinib | 362  | -    | 10.0            | 24.0             | 21.0 |
| [19]              |      |                                           | Sorafenib | 483  | -    | 11.1            | 24.0             | 16.8 |
| Maroun et al.     | 2017 | French National Health Insurance          | Sunitinib | 238  | 64   | 8.7 (6.9–9.9)   | 14.7 (11.9–18.3) | -    |
| [20]              |      | claims database                           |           |      |      |                 |                  |      |
| Noize et al. [21] | 2017 | SANTORIN French Observational Cohort      | Sunitinib | 302  | 62.3 | 8.4 (7.6–9.9)   | 23.6 (20.2–NR)   | 31.1 |
| Lalani et al.     | 2017 | Canadian Kidney Cancer Information System | Sunitinib | 577  | 64   | -               | 31.7             | -    |
| [22]              |      |                                           | Pazopanib | 93   | 65   | -               | 20.6             |      |

CI, confidence interval; HECOG, Hellenic Cooperative Oncology Group; mOS, median overall survival; mPFS, median progression-free survival; NR, not reached; ORR, objective response rate; PERCEPTION, population-based registry; RENIS, RENal information system; RWD, real world data

## References

1. Motzer RJ, Hutson TE, Tomczak P et al. Overall survival and updated results for sunitinib compared with interferon alfa in patients with metastatic renal cell carcinoma. *J Clin Oncol.* 2009;27:3584-90.
2. Motzer RJ, Hutson TE, Olsen MR et al. Randomized phase II trial of sunitinib on an intermittent versus continuous dosing schedule as first-line therapy for advanced renal cell carcinoma. *J Clin Oncol.* 2012;30:1371-7.
3. Motzer RJ, Hutson TE, Cella D et al. Pazopanib versus sunitinib in metastatic renal-cell carcinoma. *N Engl J Med.* 2013;369:722-31.
4. Motzer RJ, Barrios CH, Kim TM et al. Phase II randomized trial comparing sequential first-line everolimus and second-line sunitinib versus first-line sunitinib and second-line everolimus in patients with metastatic renal cell carcinoma. *J Clin Oncol.* 2014;32:2765-72.
5. Rini BI, Stenzl A, Zdrojowy R et al. IMA901, a multi-peptide cancer vaccine, plus sunitinib versus sunitinib alone, as first-line therapy for advanced or metastatic renal cell carcinoma (IMPRINT): a multicentre, open-label, randomised, controlled, phase 3 trial. *Lancet Oncol.* 2016;17:1599-611.
6. Armstrong AJ, Halabi S, Eisen T et al. Everolimus versus sunitinib for patients with metastatic non-clear cell renal cell carcinoma (ASPEN): a multicentre, open-label, randomised phase 2 trial. *Lancet Oncol.* 2016;17:378-88.
7. Choueiri TK, Halabi S, Sanford BL et al. Cabozantinib versus sunitinib as initial targeted therapy for patients with metastatic renal cell carcinoma of poor or intermediate risk: the Alliance A031203 CABOSUN Trial. *J Clin Oncol.* 2017;35:591-7.
8. Heng DY, Chi KN, Murray N et al. A population-based study evaluating the impact of sunitinib on overall survival in the treatment of patients with metastatic renal cell cancer. *Cancer.* 2009;115:776-83.
9. Bamias A, Karadimou A, Lampaki S et al. Prognostic stratification of patients with advanced renal cell carcinoma treated with sunitinib: comparison with the Memorial Sloan-Kettering prognostic factors model. *BMC Cancer.* 2010;10:45.

10. Schnadig ID, Hutson TE, Chung H et al. Dosing patterns, toxicity, and outcomes in patients treated with first-line sunitinib for advanced renal cell carcinoma in community-based practices. *Clin Genitourin Cancer*. 2014;12:413-21.
11. De Giorgi U, Scarpi E, Sacco C et al. Standard vs adapted sunitinib regimen in elderly patients with metastatic renal cell cancer: results from a large retrospective analysis. *Clin Genitourin Cancer*. 2014;12:182-9.
12. Miyake H, Miyazaki A, Harada K, Fujisawa M. Assessment of efficacy, safety and quality of life of 110 patients treated with sunitinib as first-line therapy for metastatic renal cell carcinoma: experience in real-world clinical practice in Japan. *Med Oncol*. 2014;31:978.
13. Sheng X, Chi Z, Cui C et al. Efficacy and safety of sorafenib versus sunitinib as first-line treatment in patients with metastatic renal cell carcinoma: largest single-center retrospective analysis. *Oncotarget*. 2016;7:27044-54.
14. Pan X, Huang H, Huang Y et al. Sunitinib dosing schedule 2/1 improves tolerability, efficacy, and health-related quality of life in Chinese patients with metastatic renal cell carcinoma. *Urol Oncol*. 2015;33:268.e9-15.
15. Tan HS, Li H, Hong YW et al. Efficacy and safety of an attenuated-dose sunitinib regimen in metastatic renal cell carcinoma: results from a prospective registry in Singapore. *Clin Genitourin Cancer*. 2015;13:e285-e295.
16. Day D, Kanjanapan Y, Kwan E et al. Patterns of care for metastatic renal cell carcinoma in Australia. *BJU Int*. 2015;116 Suppl 3:36-41.
17. Poprach A, Lakomy R, Bortlicek Z et al. Efficacy of sunitinib in elderly patients with metastatic renal cell carcinoma: data from real-world clinical practice. *Drugs Aging*. 2016;33:655-63.
18. De Groot S, Sleijfer S, Redekop WK et al. Variation in use of targeted therapies for metastatic renal cell carcinoma: results from a Dutch population-based registry. *BMC Cancer*. 2016;16:364.

19. Zhang HL, Sheng XN, Li XS et al. Sorafenib versus sunitinib as first-line treatment agents in Chinese patients with metastatic renal cell carcinoma: the largest multicenter retrospective analysis of survival and prognostic factors. *BMC Cancer*. 2017;17:16.
20. Maroun R, Fleury L, Nachbaur G, Maunoury F, Vanhille JL, Durand-Zaleski I. Real-world costs and outcomes in metastatic renal cell carcinoma patients treated with targeted therapies: a cohort study from the French health insurance database. *Curr Med Res Opin*. 2017;33:1755-62.
21. Noize P, Grelaud A, Bay JO et al. Real-life patterns of use, safety and effectiveness of sunitinib in first-line therapy of metastatic renal cell carcinoma: the SANTORIN cohort study. *Pharmacoepidemiol Drug Saf*. 2017;26:1561-9.
22. Lalani AA, Li H, Heng DYC et al. First-line sunitinib or pazopanib in metastatic renal cell carcinoma: the Canadian experience. *Can Urol Assoc J*. 2017;11:112-7.



**Supplementary Fig. 1** Sensitivity analyses for mPFS

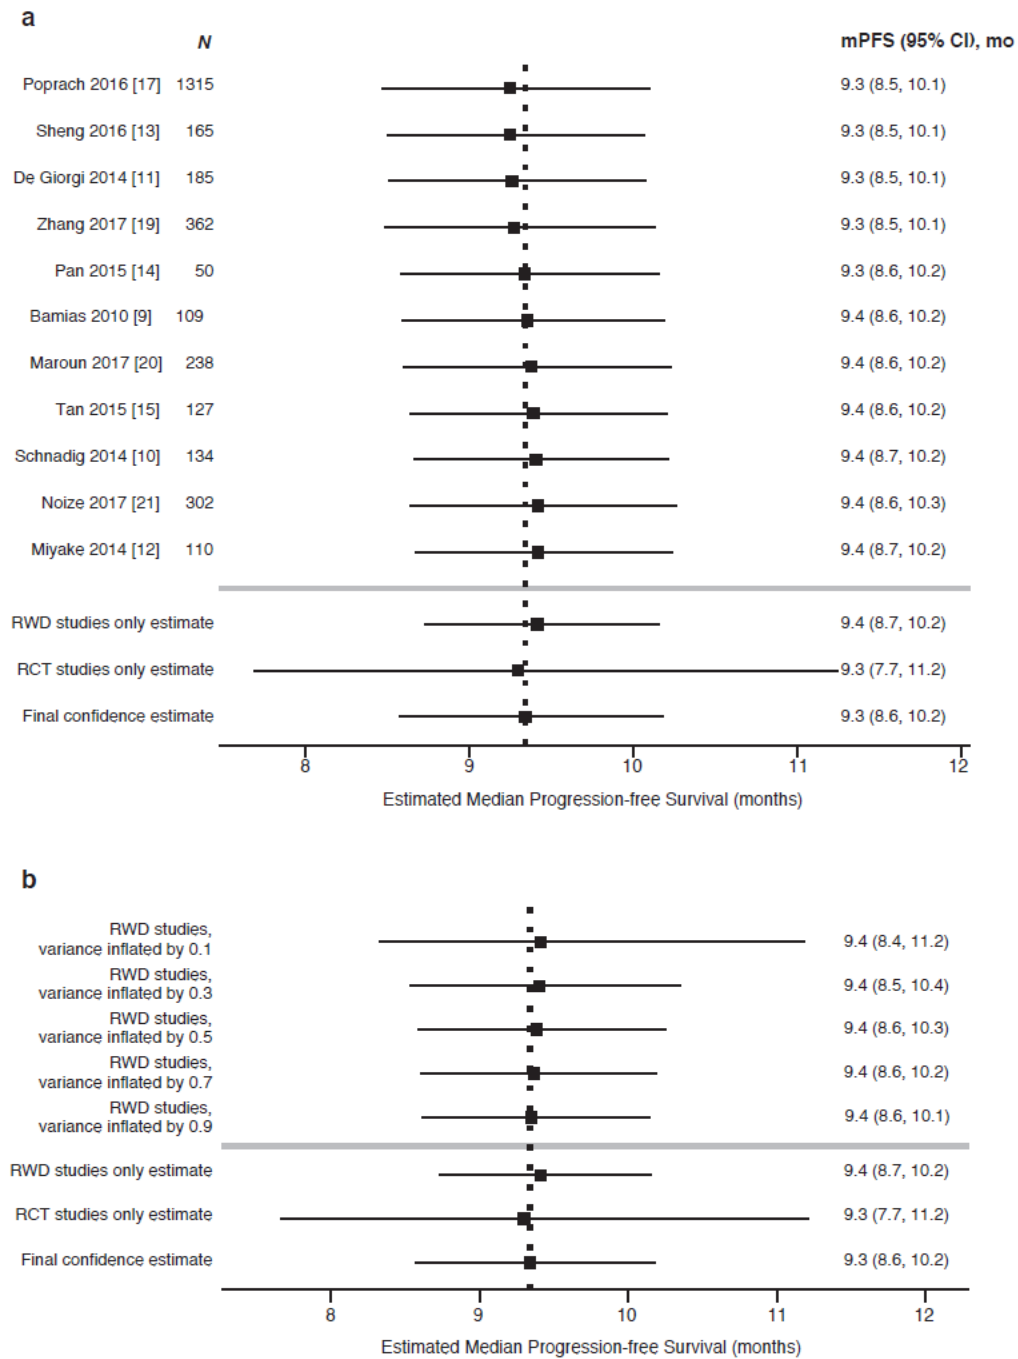

mPFS, median progression-free survival; RCT, randomized controlled trial; RWD, real-world data

**Supplementary Fig. 2** Sensitivity analyses for mOS

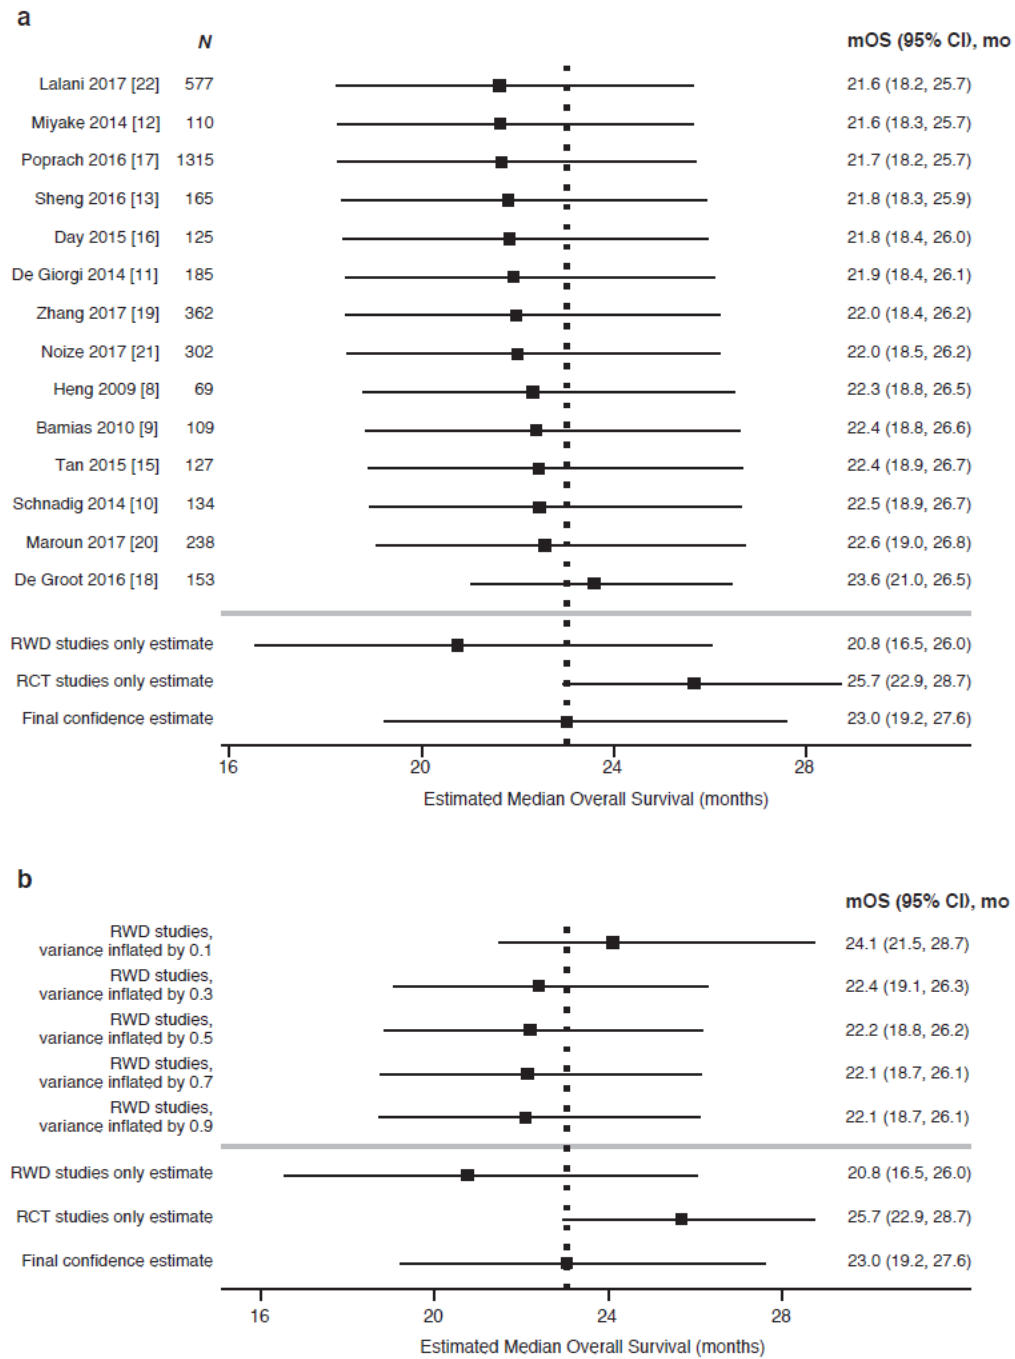

mOS, median overall survival; RCT, randomized controlled trial; RWD, real-world data

**Supplementary Fig. 3** Sensitivity analyses for ORR

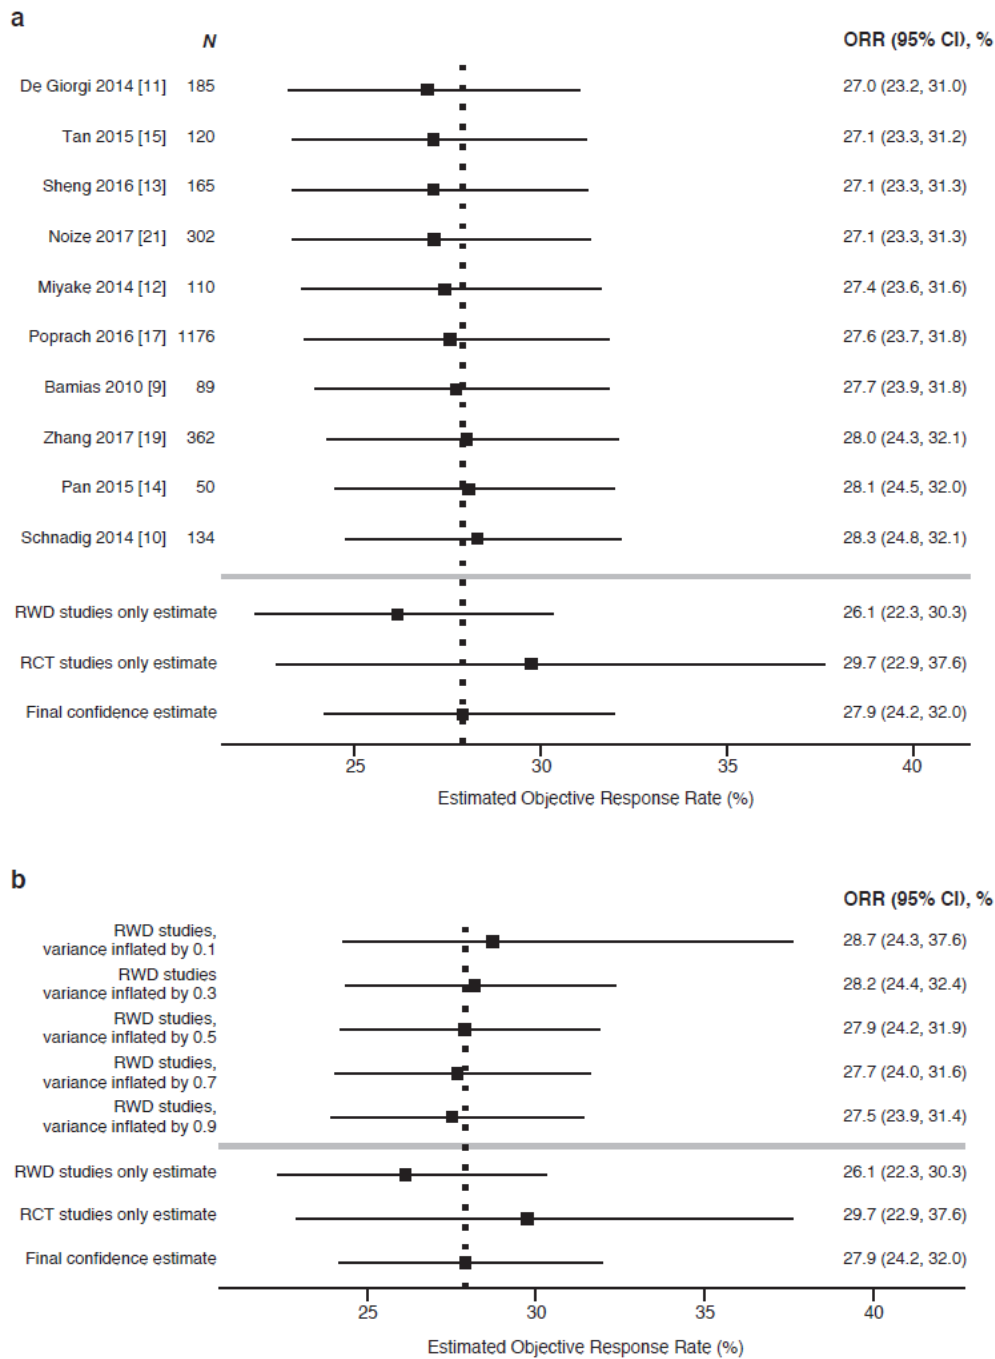

ORR, objective response rate; RCT, randomized controlled trial; RWD, real-world data.
